# Supplementary material for: Changes in transcriptomic landscape in human end-stage heart failure with distinct etiology
Source: PubMed Central journal article supplement — iScience. 2022 Feb 17;25(3):103935. doi: 10.1016/j.isci.2022.103935 (PMC8894266; doi:10.1016/j.isci.2022.103935), 2022-02-17
Supplement: mmc1.pdf [file mmc1.pdf]

iScience, Volume 25

## **Supplemental information**

### **Changes in transcriptomic landscape in human end-stage heart failure with distinct etiology**

**Miaomiao Zhu, Chao Zhang, Zhe Zhang, Xudong Liao, Dongfeng Ren, Rui Li, Shiliang Liu, Ximiao He, and Nianguo Dong**

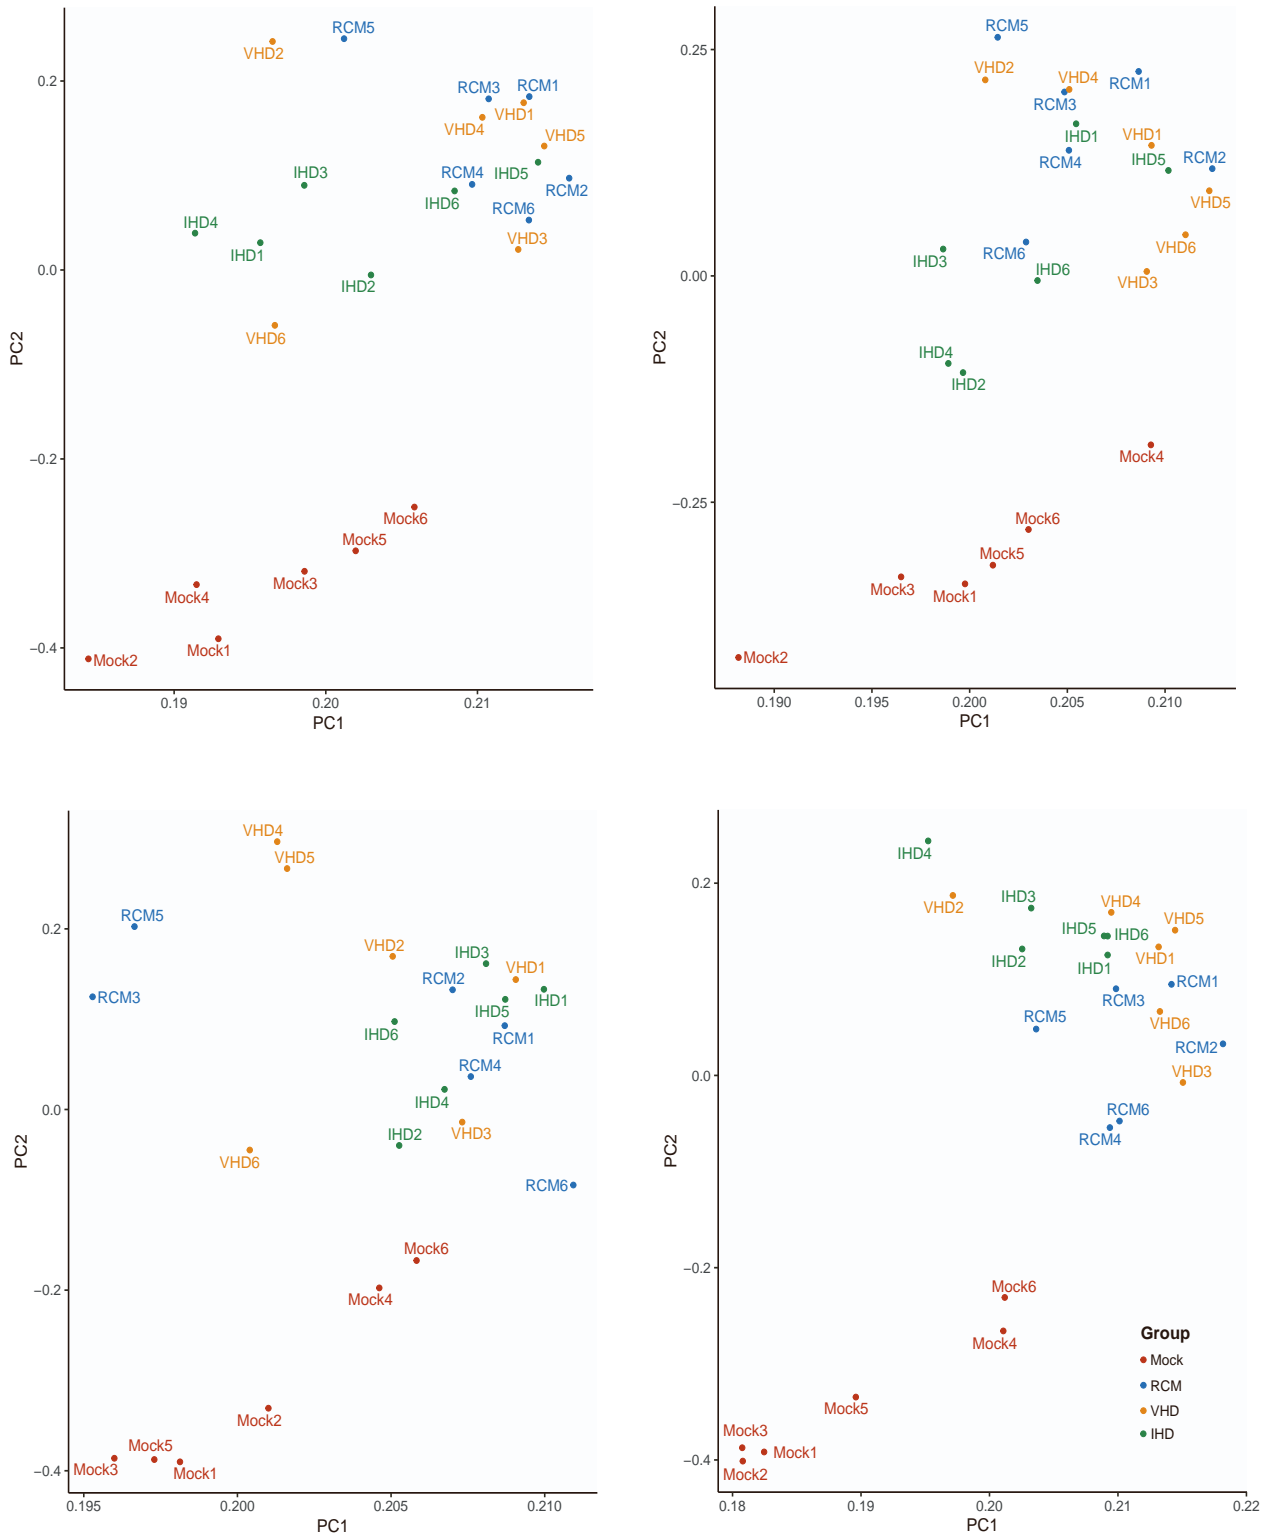

**Figure S1.** PCA plot of different expressed genes in each sample of mRNA, lncRNA, miRNA and circRNA. (related to Figure 1)

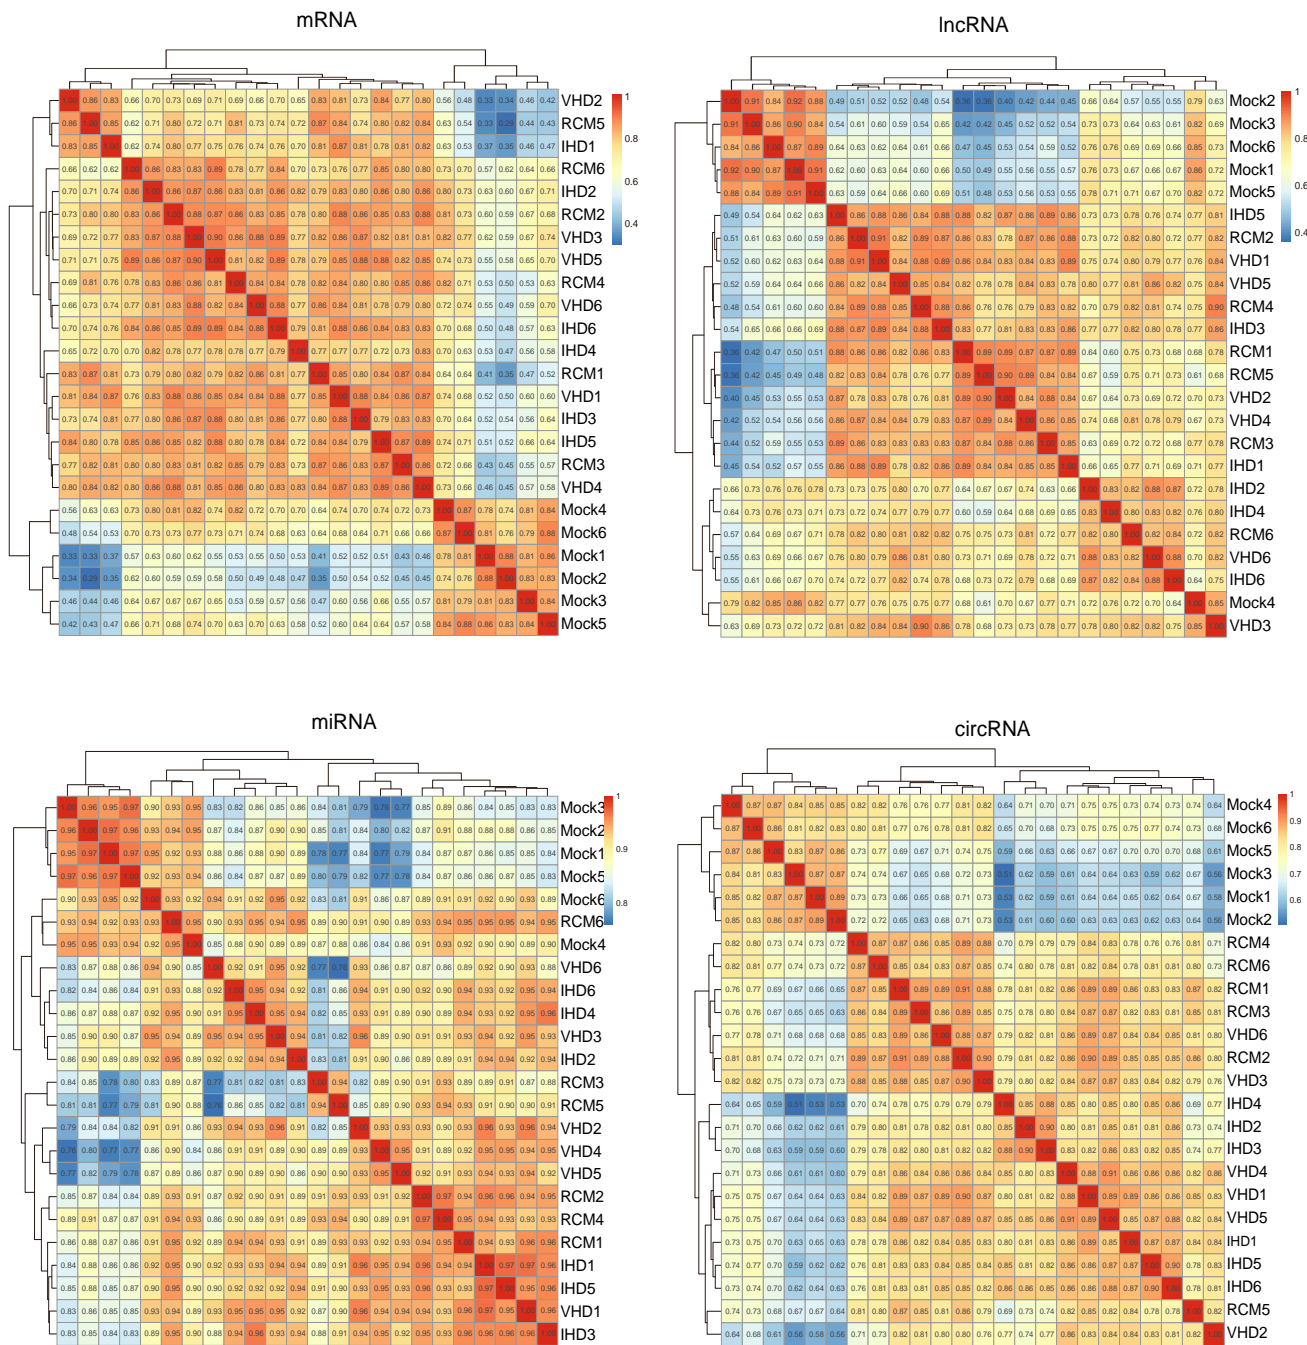

**Figure S2.** Correlation heatmap of different expressed genes in each sample of mRNA, lncRNA, miRNA and circRNA. (related to Figure 1)

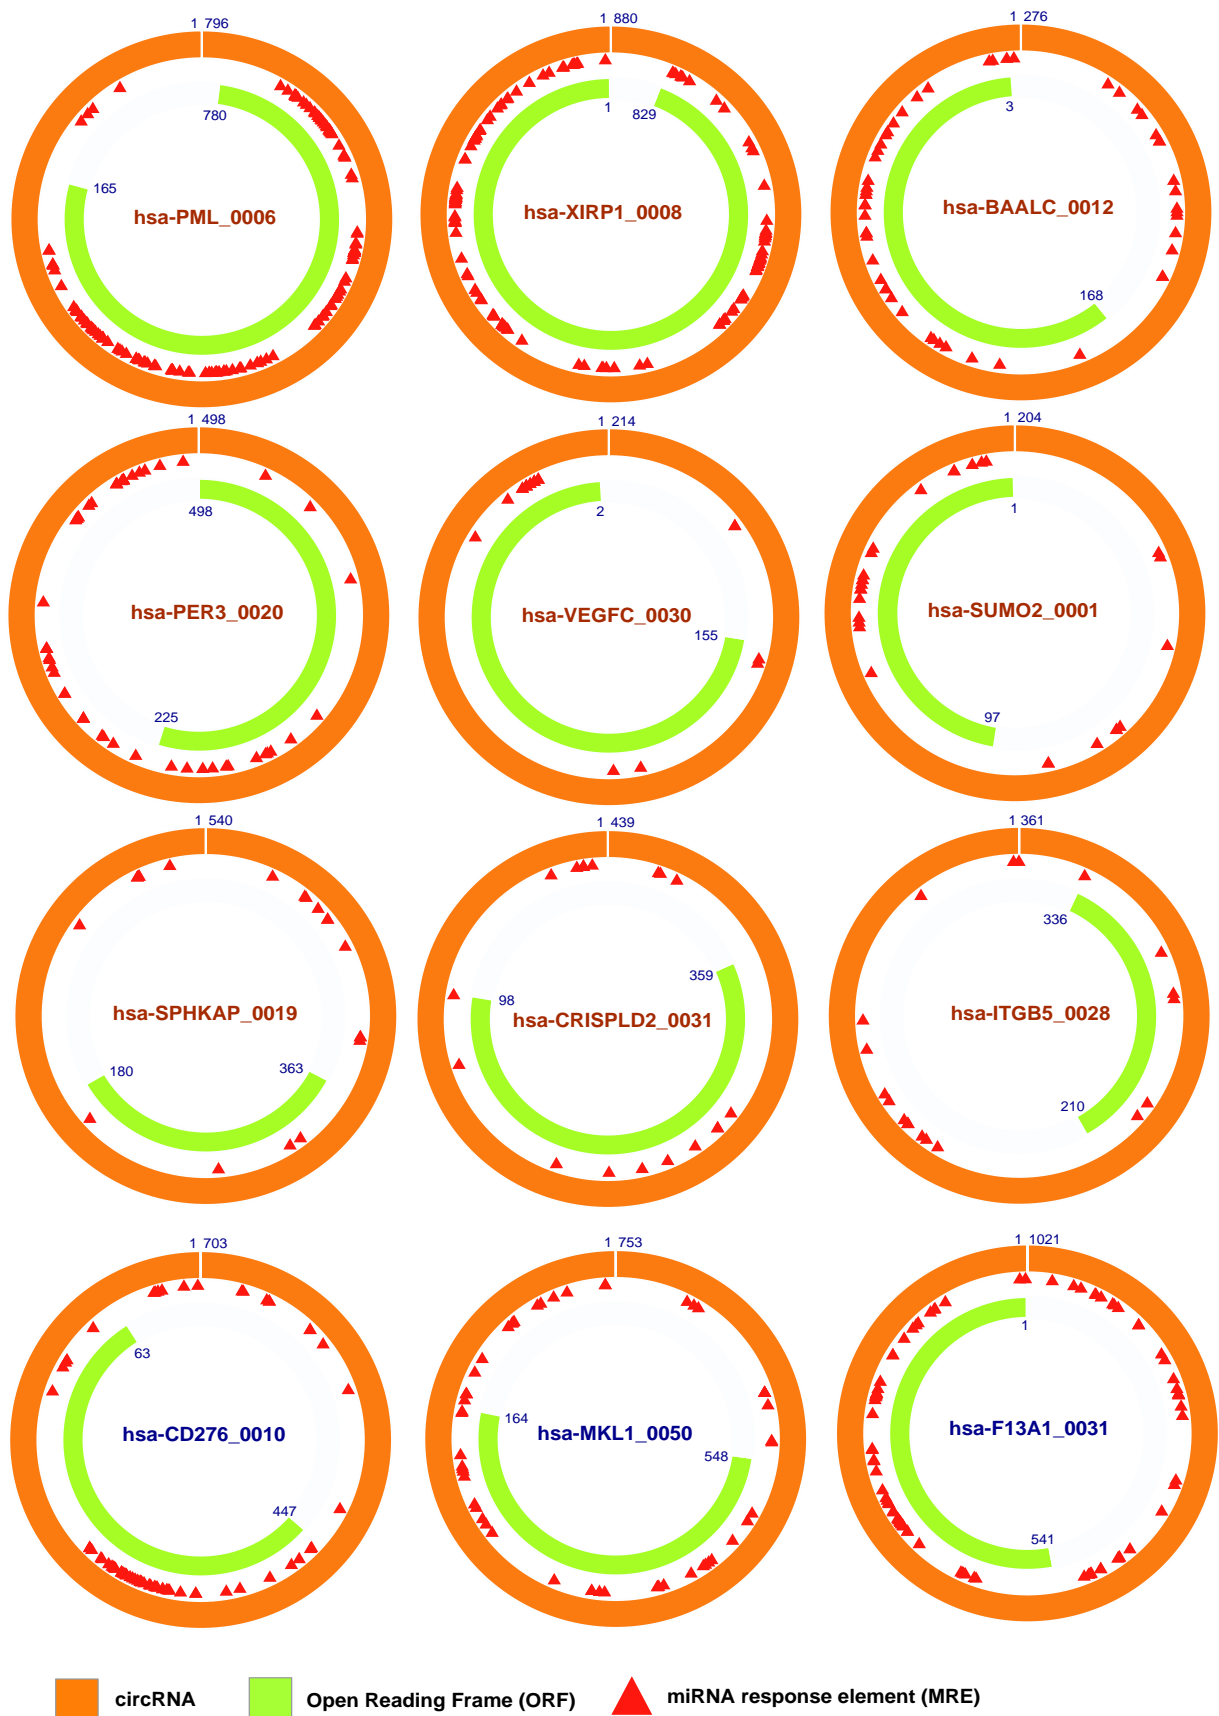

**Figure S3.** The structure of differentially expressed circRNAs which corresponding mRNA had been reported to be related to HF and more than 100bp in length. (related to Figure 5)

**Table S1.** Clinical information for non-failing hearts (transplant donor heart failed to implant after heart acquisition), RCM patients, IHD patients and VHD patients.

(related to experimental model and subject details section in STAR Methods)

|                    | Age                        | Gender       | BMI(kg/m <sup>2</sup> ) | Hypertension | Diabetes mellitus |
|--------------------|----------------------------|--------------|-------------------------|--------------|-------------------|
| <b>Control (6)</b> | 26.2 (15-41)               | 5            | 22.67±2.10              | 0            | 0                 |
|                    | 15                         | M            | 19.2                    | N            | N                 |
|                    | 18                         | M            | 21.8                    | N            | N                 |
|                    | 27                         | F            | 22.3                    | N            | N                 |
|                    | 41                         | M            | 25                      | N            | N                 |
|                    | 21                         | M            | 23.2                    | N            | N                 |
| <b>RCM (6)</b>     | 18.3 (5-33)                | 2            | 22.15±1.30              | 0            | 0                 |
|                    | 11                         | F            | 23.6                    | N            | N                 |
|                    | 24                         | M            | 20.1                    | N            | N                 |
|                    | 31                         | M            | 21.9                    | N            | N                 |
|                    | 6                          | M            | 23.5                    | N            | N                 |
|                    | 5                          | F            | 22.2                    | N            | N                 |
| <b>IHD (6)</b>     | 46.3 (43-50)               | 6            | 22.08±1.64              | 2            | 4                 |
|                    | 46                         | M            | 24.1                    | N            | Y                 |
|                    | 43                         | M            | 23.6                    | N            | Y                 |
|                    | 45                         | M            | 21                      | Y            | Y                 |
|                    | 47                         | M            | 22.9                    | N            | N                 |
|                    | 50                         | M            | 20.6                    | N            | Y                 |
| <b>VHD (6)</b>     | 51.5 (30-65)               | 4            | 19.63±1.07              | 2            | 1                 |
|                    | 47                         | M            | 20.3                    | Y            | Y                 |
|                    | 65                         | F            | 18.2                    | N            | N                 |
|                    | 38                         | M            | 20.7                    | Y            | N                 |
|                    | 30                         | M            | 20.3                    | N            | N                 |
|                    | 47                         | M            | 19.9                    | Y            | N                 |
|                    | 64                         | F            | 18.4                    | N            | N                 |
|                    | 65                         | M            | 20.3                    | N            | Y                 |
|                    | History of cardiac surgery | IABP history | ECMO history            | EF           |                   |
| <b>Control (6)</b> | 0                          | 0            | 0                       | 62.3±5.16    |                   |
|                    | N                          | N            | N                       | 55           |                   |
|                    | N                          | N            | N                       | 60           |                   |
|                    | N                          | N            | N                       | 70           |                   |
|                    | N                          | N            | N                       | 60           |                   |
|                    | N                          | N            | N                       | 65           |                   |
| <b>RCM (6)</b>     | 0                          | 0            | 0                       | 45.17±4.67   |                   |
|                    | N                          | N            | N                       | 45           |                   |
|                    | N                          | N            | N                       | 40           |                   |
|                    | N                          | N            | N                       | 41           |                   |
|                    | N                          | N            | N                       | 47           |                   |
|                    | N                          | N            | N                       | 53           |                   |
| <b>IHD (6)</b>     | 2                          | 4            | 0                       | 22.67±4.17   |                   |
|                    | N                          | Y            | N                       | 20           |                   |
|                    | Y                          | N            | N                       | 30           |                   |
|                    | N                          | Y            | N                       | 22           |                   |
|                    | N                          | N            | N                       | 20           |                   |
|                    | N                          | Y            | N                       | 25           |                   |
| <b>VHD (6)</b>     | 3                          | 2            | 1                       | 23.5±2.81    |                   |
|                    | N                          | N            | N                       | 25           |                   |
|                    | Y                          | Y            | Y                       | 27           |                   |
|                    | Y                          | N            | N                       | 19           |                   |
|                    | Y                          | Y            | N                       | 22           |                   |
|                    | N                          | N            | N                       | 25           |                   |
|                    | N                          | N            | 23                      |              |                   |

**Table S2.** Sequencing information for miRNA-seq data of non-failing hearts (transplant donor heart failed to implant after heart acquisition), RCM patients, VHD patients and IHD patients  
(related to transcriptome alignment section in STAR Methods)

| <b>Samples</b> | <b>Number of Reads</b> | <b>Number of Mapped reads</b> | <b>Mapped reads</b> |
|----------------|------------------------|-------------------------------|---------------------|
| Mock1          | 22034615               | 19045108                      | 86.43%              |
| Mock2          | 19948736               | 16193670                      | 81.18%              |
| Mock3          | 28705578               | 25312634                      | 88.18%              |
| Mock4          | 30878971               | 27157328                      | 87.95%              |
| Mock5          | 25969731               | 21634126                      | 83.31%              |
| Mock6          | 31678394               | 27377372                      | 86.42%              |
| RCM1           | 28781287               | 24900232                      | 86.52%              |
| RCM2           | 22449557               | 18499440                      | 82.40%              |
| RCM3           | 26348389               | 23227362                      | 88.15%              |
| RCM4           | 22472398               | 19760051                      | 87.93%              |
| RCM5           | 29789956               | 25266040                      | 84.81%              |
| RCM6           | 24485447               | 22078302                      | 90.17%              |
| VHD1           | 34025402               | 29317708                      | 86.16%              |
| VHD2           | 21483488               | 14836832                      | 69.06%              |
| VHD3           | 21664619               | 17917767                      | 82.71%              |
| VHD4           | 30324943               | 24255790                      | 79.99%              |
| VHD5           | 22664333               | 19245270                      | 84.91%              |
| VHD6           | 22325798               | 11949544                      | 53.52%              |
| IHD1           | 32629309               | 27807077                      | 85.22%              |
| IHD2           | 22241884               | 20167865                      | 90.68%              |
| IHD3           | 22086200               | 19348914                      | 87.61%              |
| IHD4           | 21937549               | 18898733                      | 86.15%              |
| IHD5           | 34694527               | 29792474                      | 85.87%              |
| IHD6           | 33125320               | 16678568                      | 50.35%              |

**Table S3.** Sequencing information for circRNA-seq data of non-failing hearts (transplant donor heart failed to implant after heart acquisition), RCM patients, VHD patients and IHD patients  
(related to transcriptome alignment section in STAR Methods)

| <b>Samples</b> | <b>Number of Reads</b> | <b>Number of Mapped reads</b> | <b>Mapped reads</b> |
|----------------|------------------------|-------------------------------|---------------------|
| Mock1          | 33688277               | 32237784                      | 95.69%              |
| Mock2          | 34257276               | 32833125                      | 95.84%              |
| Mock3          | 34163678               | 32974590                      | 96.52%              |
| Mock4          | 33712840               | 32719190                      | 97.05%              |
| Mock5          | 33778752               | 32756112                      | 96.97%              |
| Mock6          | 33789568               | 32778361                      | 97.01%              |
| RCM1           | 33593879               | 32245345                      | 95.99%              |
| RCM2           | 33466800               | 31988241                      | 95.58%              |
| RCM3           | 33553619               | 31917064                      | 95.12%              |
| RCM4           | 34009300               | 32689673                      | 96.12%              |
| RCM5           | 33934393               | 32706620                      | 96.38%              |
| RCM6           | 33813330               | 32176525                      | 95.16%              |
| VHD1           | 33711130               | 32553635                      | 96.57%              |
| VHD2           | 33689098               | 32255323                      | 95.74%              |
| VHD3           | 33916971               | 32541175                      | 95.94%              |
| VHD4           | 33577447               | 32088836                      | 95.57%              |
| VHD5           | 33342018               | 30292410                      | 90.85%              |
| VHD6           | 33639065               | 32550229                      | 96.76%              |
| IHD1           | 33265997               | 32021369                      | 96.26%              |
| IHD2           | 33875323               | 26744568                      | 78.95%              |
| IHD3           | 33527941               | 26081385                      | 77.79%              |
| IHD4           | 33861834               | 27489037                      | 81.18%              |
| IHD5           | 33796619               | 32165765                      | 95.17%              |
| IHD6           | 33659366               | 32101721                      | 95.37%              |

**Table S4.** Sequencing information for mRNA-seq and lncRNA-seq data of non-failing hearts (transplant donor heart failed to implant after heart acquisition), RCM patients, VHD patients and IHD patients.  
(related to transcriptome alignment section in STAR Methods)

| <b>Samples</b> | <b>Number of Reads</b> | <b>Number of Mapped reads</b> | <b>Mapped reads</b> |
|----------------|------------------------|-------------------------------|---------------------|
| Mock1          | 34213302               | 33726556                      | 98.58%              |
| Mock2          | 34288309               | 33842263                      | 98.70%              |
| Mock3          | 34274587               | 33847153                      | 98.75%              |
| Mock4          | 33568630               | 33096180                      | 98.59%              |
| Mock5          | 34270846               | 33547073                      | 97.89%              |
| Mock6          | 34221366               | 33827695                      | 98.85%              |
| RCM1           | 34304628               | 33840097                      | 98.65%              |
| RCM2           | 34280206               | 33825589                      | 98.67%              |
| RCM3           | 34309161               | 33881341                      | 98.75%              |
| RCM4           | 33521084               | 33019248                      | 98.50%              |
| RCM5           | 34194212               | 33738509                      | 98.67%              |
| RCM6           | 34129361               | 33692150                      | 98.72%              |
| VHD1           | 34189092               | 33761377                      | 98.75%              |
| VHD2           | 34270948               | 33847653                      | 98.76%              |
| VHD3           | 34269738               | 33874063                      | 98.85%              |
| VHD4           | 34271558               | 33778355                      | 98.56%              |
| VHD5           | 34365197               | 33886082                      | 98.61%              |
| VHD6           | 33587743               | 33109673                      | 98.58%              |
| IHD1           | 33620328               | 33013552                      | 98.20%              |
| IHD2           | 36793227               | 35626511                      | 96.83%              |
| IHD3           | 37365938               | 36314627                      | 97.19%              |
| IHD4           | 36727353               | 35259204                      | 96.00%              |
| IHD5           | 34279453               | 33718738                      | 98.36%              |
| IHD6           | 34398150               | 33860746                      | 98.44%              |
